# Supplementary material
Source: publisher figshare collection journal article supplement (https://asha.figshare.com/articles/dataset/_/15057396)
Supplement: Supplementary file 1 [file 1]

Translation of comments from Greek to English from Margarita Kilili-Lesta.

Three-hour Webinar on the subject of:

# **“Application of Telepractice in Speech-Language Therapy”**

**EVALUATION**

**April 4 2020**

**CYPRUS ASSOCIATION OF  
REGISTERED  
SPEECH-LANGUAGE PATHOLOGISTS**

## Participants' comments

- I have watched the webinar. It was really good and had useful information!
- I hope that we all continue our action in the field of speech-language therapy. The webinar was useful in the specific time period for our professional course and for the quality of our work.
- It is a webinar that is truly worth watching by all specialties. The speakers were excellent, with targeted activities and with practical solutions for distance therapy and education. I would like, through this post to say congratulations to all organizers and speakers. Well done ♥
- I watched your webinar and it was very useful! It was a wonderful initiative, you are an exceptional team of professionals!

## Participants' comments

- I would like to thank you so much for the opportunity to watch this so useful and current-events webinar, but also for all the actions you so timely and aptly took, for the defence of the rights of our profession.
- We thank you so much, the webinar was very helpful, warm congratulations to all speakers and organisers.
- I have watched it and it was very interesting!
- I would like to thank CARSLP, as well as each individual speaker in person for their initiative, as well as for their time that they dispensed for organizing this so interesting webinar.
- I have watched the webinar and thank you so much for this capability. It was very helpful.
- I found it extremely informative and useful! We thank you so much for the support!

## Participants' comments

- I have watched the webinar, which was excellent. The information, the instructions for the programs/software and all the content was very helpful. The same goes for the speakers. I hope we receive the video or some notes so that we can utilize all that you taught us. Thank you so much!
- Thank you for all the knowledge I received! Precious tool in nowadays, but also not just for now!
- I found it useful, especially helpful and I greatly thank you for the work that you have done!
- I watched the webinar and I thank you so much for the opportunity you gave me. I congratulate the webinar's speech-language therapy colleagues for the very interesting subject and their presentations.
- I wish you well for the possibility you gave us.
